# Supplementary material
Source: publisher site journal article supplement (https://www.degruyterbrill.com/publication/isbn/9783486710038/downloadAsset/9783486710038_Buchinformation.pdf)
Supplement: Supplementary file 1 [file 9783486710038_Buchinformation.pdf]

## Lernen und anwenden

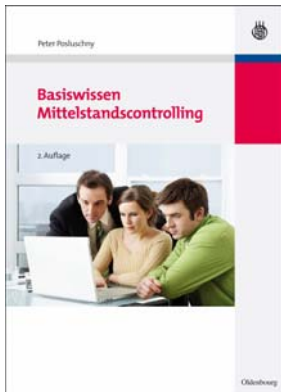

Peter Posluschny

### Basiswissen Mittelstandscontrolling

2. vollständig überarbeitete und wesentlich erweiterte Auflage

IX, 300 Seiten | Broschur | 39,80 €

ISBN 978-3-486-59102-6

Das Buch gibt Antworten auf die Fragen Basel II - Chance oder Nachteil? Warum ist ein Controlling für mittelständische Unternehmen notwendig? Wie kann man mit Kennzahlen den Jahresabschluss beurteilen? Wie kann man mit Rentabilität, Liquidität und Budgets planen? Wie kalkuliert man seine Leistungen richtig? Wie kann man die Kosten senken? Wie kann man seine Kostenrechnung als Controllinginstrument einsetzen?

Hierzu helfen Controlling orientierte Analysen und Planungen sowie die geeignete Zusammenstellung der Formeln, Planungs- und Berechnungstabellen.

Ziel des Buches ist daher Lernen und Anwenden mit Praxisorientierung. Dies wird durch unmittelbare Lösungen für das Controlling in mittelständischen Unternehmen sowie leicht verständliche Umsetzungsmöglichkeiten erreicht.

---

Das Buch richtet sich an Personen, die Mittelstandscontrolling praxisorientiert lernen beziehungsweise anwenden wollen.

---

Dipl.-Volksw. Peter Posluschny beschäftigt sich insbesondere mit Fragen der Existenzgründung, der Kostenrechnung und des Controllings in mittelständischen Unternehmen.

[www.oldenbourg.de](http://www.oldenbourg.de)

Pressereferat Wirtschafts- und Sozialwissenschaften

Oldenbourg Wissenschaftsverlag | Rosenheimer Str. 145 | 81671 München

Tel.: +49 89 45051-468 | Fax: +49 89 45051-292 | [presse-wiso@oldenbourg.de](mailto:presse-wiso@oldenbourg.de)

Alle Veröffentlichungen des Oldenbourg Verlags sind über den Buchhandel zu beziehen.

Rezensionsexemplare auf Anforderung.
